# Supplementary material for: Targeting SOX18 Transcription Factor Activity by Small-Molecule Inhibitor Sm4 in Non-Small Lung Cancer Cell Lines
Source: MDPI journal article supplement (doi:10.3390/ijms241411316), 2023-07-11
Supplement: s1 [file s1]

## Supplementary Information

# Targeting SOX18 Transcription Factor Activity by Small-Molecule Inhibitor Sm4 in Non-Small Lung Cancer Cell Lines

Olga Rodak <sup>1,\*</sup>, Monika Mrozowska <sup>1</sup>, Agnieszka Rusak <sup>1</sup>, Agnieszka Gomułkiewicz <sup>1</sup>, Aleksandra Piotrowska <sup>1</sup>, Mateusz Olbromski <sup>1,\*</sup>, Marzenna Podhorska-Okolów <sup>2</sup>, Maciej Ugorski <sup>3</sup> and Piotr Dziegiel <sup>1,4</sup>

<sup>1</sup> Division of Histology and Embryology, Department of Human Morphology and Embryology, Wrocław Medical University, 50-368 Wrocław, Poland; monika.mrozowska@umw.edu.pl (M.M.); agnieszka.rusak@umw.edu.pl (A.R.); agnieszka.gomulkiewicz@umw.edu.pl (A.G.); aleksandra.piotrowska@umw.edu.pl (A.P.); piotr.dziegiel@umw.edu.pl (P.D.)

<sup>2</sup> Division of Ultrastructural Research, Department of Human Morphology and Embryology, Wrocław Medical University, 50-368 Wrocław, Poland; marzenna.podhorska-okolow@umw.edu.pl

<sup>3</sup> Department of Biochemistry and Molecular Biology, Faculty of Veterinary Medicine, Wrocław University of Environmental and Life Sciences, 50-375 Wrocław, Poland; maciej.ugorski@upwr.edu.pl

<sup>4</sup> Department of Physiotherapy, University School of Physical Education, 51-612 Wrocław, Poland

\* Correspondence: olga.rodak@student.umw.edu.pl (O.R.); mateusz.olbromski@umw.edu.pl (M.O.)

## LIST OF CONTENTS:

1. Figure S1
2. Figure S2

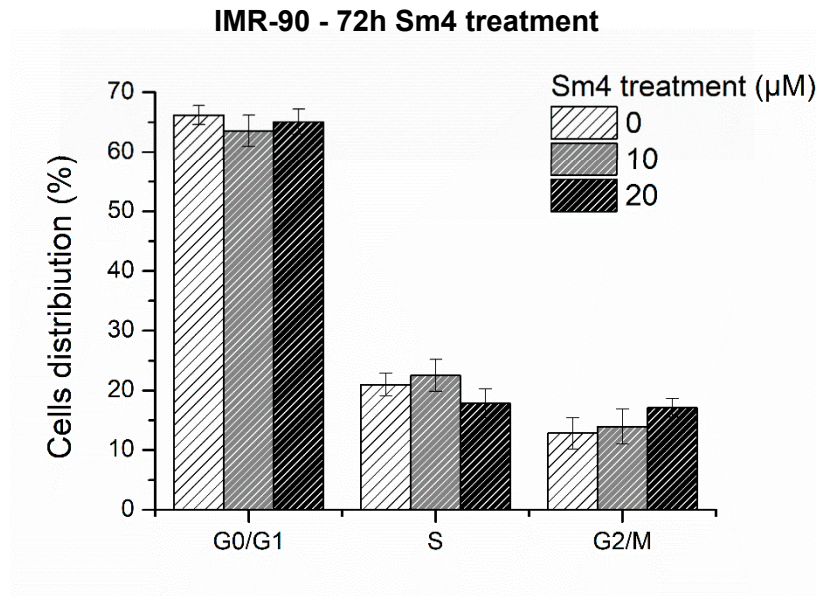

**Figure S1.** Cell cycle assay for IMR-90 cell line. No Statistical differences were observed in normal lung fibroblast cell line between control not treated and treated cells.

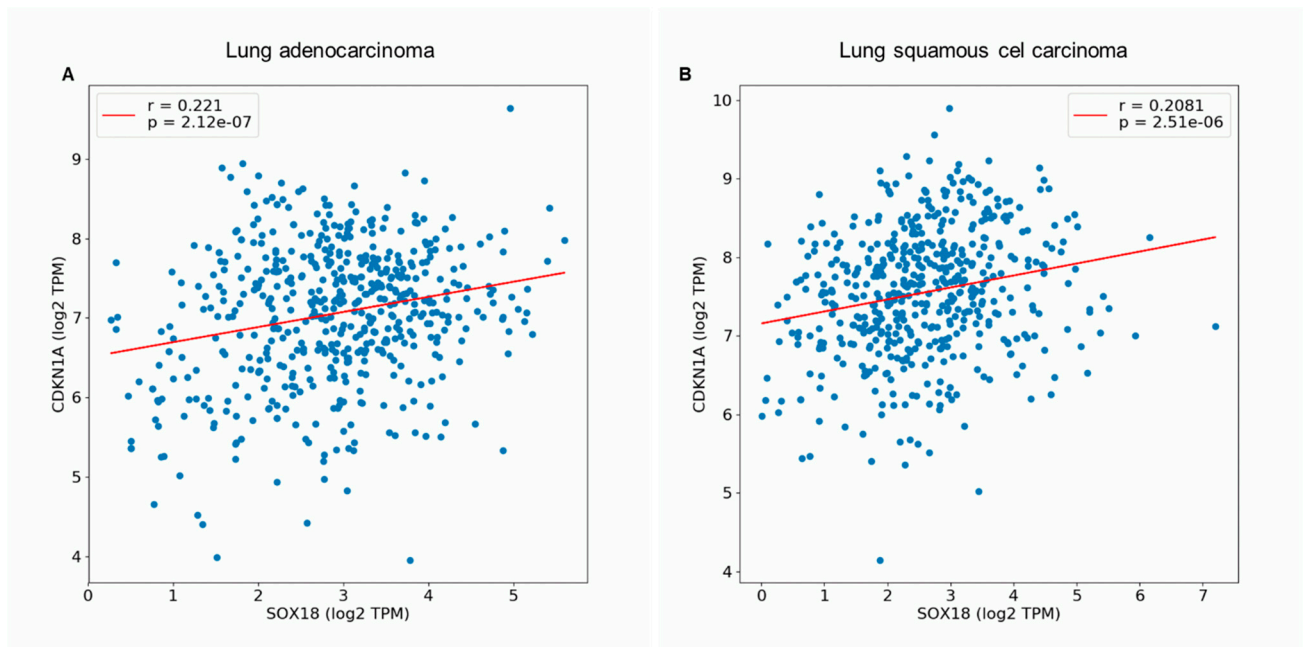

**Figure S2.** Correlation analysis of *SOX18* and *CDKN1A* mRNA levels. Positive correlation was obtained in both lung cancer subtype i.e.: (A) adenocarcinoma, (B) squamous cell carcinoma. The source of this data is publicly accesable OncoDb dataset (<https://oncodb.org/>).
